# Supplementary material for: Electroless plating of copper nanoparticles on PET fiber for non-enzymatic electrochemical detection of H2O2
Source: Royal Society of Chemistry journal article supplement (doi:10.1039/c5ra10157c), 2015-01-01

## Supplementary Information

### Electroless plating of copper nanoparticles on PET fiber for non-enzymatic electrochemical detection of H<sub>2</sub>O<sub>2</sub>

Eunju Kim, Narayanasamy Sabari Arul and Jeong In Han\*

Department of Chemical and Biochemical Engineering, Dongguk University–Seoul, 100715, South Korea.

\*Corresponding author email: [hanji@dongguk.edu](mailto:hanji@dongguk.edu) Phone: +82 2 2260 3364 Fax: 82-2-2268-8719.

Figure S1. XRD pattern of Cu-coated PET fiber prepared at 70° C

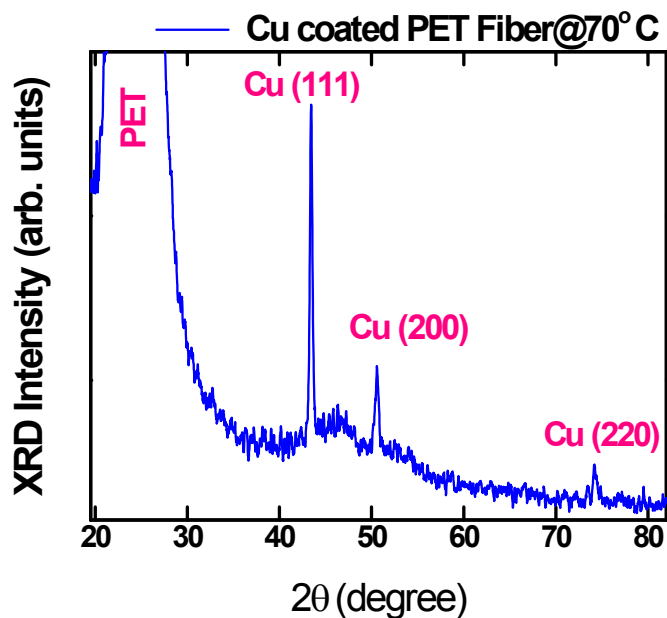

Figure S2. I-V curves of Cu-coated PET at various reaction temperatures

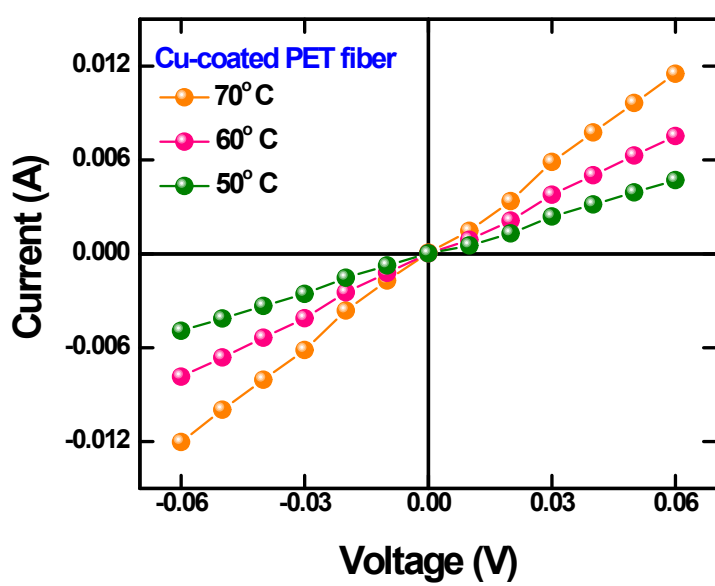

Supplement: c5ra10157c1.pdf [file c5ra10157c1.pdf]
